# Supplementary material for: Plant In Vitro Cultures of Coleus scutellarioides (L.) Benth. “Electric Lime” and Possibilities of Modification in the Biosynthesis of Volatile Compounds
Source: MDPI journal article supplement (doi:10.3390/molecules29102193), 2024-05-08
Supplement: s1 [file s1]

**Table S1.** Matrix of correlation coefficients for the dependence of the synthesis of the analyzed volatile compounds on the cultivation conditions - the presence of applied phytohormones in relation to *in vitro* control conditions.

| Condition of cultivation | Range of volatile compounds<br>4815.9 – 144.0 $\mu\text{g g}^{-1}$ | Range of volatile compounds<br>368.0 – 0.1 $\mu\text{g g}^{-1}$ | Range of volatile compounds<br>87.2 – 0.0 $\mu\text{g g}^{-1}$ |
|--------------------------|--------------------------------------------------------------------|-----------------------------------------------------------------|----------------------------------------------------------------|
|                          | Control <i>in vitro</i>                                            | Control <i>in vitro</i>                                         | Control <i>in vitro</i>                                        |
| BA                       | 0.98*                                                              | 0.90*                                                           | 0.82*                                                          |
| Fluridone                | 1.00*                                                              | 0.79*                                                           | 0.88*                                                          |
| NAA                      | 1.00*                                                              | 0.98*                                                           | 0.82*                                                          |
| IAA                      | 0.98*                                                              | 0.88*                                                           | 0.71*                                                          |

\*Correlations denoted by the correlation coefficient are significant with  $p < 0.5000$ .
